# Supplementary material
Source: publisher figshare collection journal article supplement (https://acs.figshare.com/ndownloader/files/26351334)
Supplement: Supplementary file 1 [file 26351334]

Compound_ID,SMILES,anti-GM3 IgG response ,IFN-gama production ,IL-4 production ,"the binding of the antisera to  B16F10
tumor cells","complement dependent
cytotoxicity towards B16F10 tumor cells"
GM3-¦ÁGalCer,O[C@H]([C@@H](O)[C@H](OCCOCCNC(CCCCC(NC[C@H]1O[C@H](OC[C@H](NC(C#CC#CC#CC#CC#CC#CC#CC#CC#CC#CC#CC#CC)=O)[C@H](O)[C@H](O)CCCCCCCCCCCCCC)[C@H](O)[C@@H](O)[C@H]1O)=O)=O)O[C@@H]2CO)[C@@H]2O[C@H]3[C@H](O)[C@@H](O[C@]4(C(O)=O)C[C@H](O)[C@@H](NC(C)=O)C([C@H](O)[C@H](O)CO)O4)[C@@H](O)[C@@H](CO)O3.[HH].[HH].[HH].[HH].[HH].[HH].[HH].[HH].[HH].[HH].[HH].[HH].[HH].[HH].[HH].[HH].[HH].[HH].[HH].[HH].[HH].[HH].[HH].[HH],Strong,Strong,Strong,Strong,significant
GM3-¦ÂGalCer (with ¦ÁGalCer),O[C@H]([C@@H](O)[C@H](OCCOCCNC(CCCCC(NC[C@H]1O[C@@H](OC[C@H](NC(C#CC#CC#CC#CC#CC#CC#CC#CC#CC#CC#CC#CC)=O)[C@H](O)[C@H](O)CCCCCCCCCCCCCC)[C@H](O)[C@@H](O)[C@H]1O)=O)=O)O[C@@H]2CO)[C@@H]2O[C@H]3[C@H](O)[C@@H](O[C@]4(C(O)=O)C[C@H](O)[C@@H](NC(C)=O)C([C@H](O)[C@H](O)CO)O4)[C@@H](O)[C@@H](CO)O3.[HH].[HH].[HH].[HH].[HH].[HH].[HH].[HH].[HH].[HH].[HH].[HH].[HH].[HH].[HH].[HH].[HH].[HH].[HH].[HH].[HH].[HH].[HH].[HH],Strong,Strong,Strong,Weak,not significant
GM3-Pam (with ¦ÁGalCer),O[C@H]([C@@H](O)[C@H](OCCOCCNC(CCCCCCCCCCCCCCC)=O)O[C@@H]1CO)[C@@H]1O[C@H]2[C@H](O)[C@@H](O[C@]3(C(O)=O)C[C@H](O)[C@@H](NC(C)=O)C([C@H](O)[C@H](O)CO)O3)[C@@H](O)[C@@H](CO)O2,Weak,Strong,Strong,/,/
GM3-Pam2 (with ¦ÁGalCer),O[C@H]([C@@H](O)[C@H](OCCOCCNC(C(CCCCNC(CCCCCCCCCCCCCCC)=O)NC(CCCCCCCCCCCCCCC)=O)=O)O[C@@H]1CO)[C@@H]1O[C@H]2[C@H](O)[C@@H](O[C@]3(C(O)=O)C[C@H](O)[C@@H](NC(C)=O)C([C@H](O)[C@H](O)CO)O3)[C@@H](O)[C@@H](CO)O2,Weak,Strong,Strong,Weak,not significant
GM3-Chol (with ¦ÁGalCer),C[C@H](CCCC(C)C)[C@H]1CC[C@@]2([H])C3CC=C4C[C@@H](OC(NCCOCCO[C@H](O[C@@H]5CO)[C@H](O)[C@@H](O)[C@@H]5O[C@H]6[C@H](O)[C@@H](O[C@]7(C(O)=O)C[C@H](O)[C@@H](NC(C)=O)C([C@H](O)[C@H](O)CO)O7)[C@@H](O)[C@@H](CO)O6)=O)CC[C@]4(C)[C@@]3([H])CC[C@@]21C,Weak,Strong,Strong,/,/
GM3-¦ÂGalCer ,O[C@H]([C@@H](O)[C@H](OCCOCCNC(CCCCC(NC[C@H]1O[C@@H](OC[C@H](NC(C#CC#CC#CC#CC#CC#CC#CC#CC#CC#CC#CC#CC)=O)[C@H](O)[C@H](O)CCCCCCCCCCCCCC)[C@H](O)[C@@H](O)[C@H]1O)=O)=O)O[C@@H]2CO)[C@@H]2O[C@H]3[C@H](O)[C@@H](O[C@]4(C(O)=O)C[C@H](O)[C@@H](NC(C)=O)C([C@H](O)[C@H](O)CO)O4)[C@@H](O)[C@@H](CO)O3.[HH].[HH].[HH].[HH].[HH].[HH].[HH].[HH].[HH].[HH].[HH].[HH].[HH].[HH].[HH].[HH].[HH].[HH].[HH].[HH].[HH].[HH].[HH].[HH],Weak,Weak,Weak,/,/
